# Supplementary material for: Corallococcus soli sp. Nov., a Soil Myxobacterium Isolated from Subtropical Climate, Chalus County, Iran, and Its Potential to Produce Secondary Metabolites
Source: MDPI journal article supplement (doi:10.3390/microorganisms10071262), 2022-06-21
Supplement: s1 [file s1]

*Corallococcus soli* sp. nov., a soil myxobacterium isolated from subtropical climate, Chalus county, Iran and its potential to produce secondary metabolites

Zahra Khosravi Babadi<sup>1,2\*†</sup>, Ronald Garcia<sup>3,4†</sup>, Gholam Hossein Ebrahimipour<sup>1</sup>, Chandra Risdian<sup>2,5†</sup>, Peter Kämpfer<sup>6</sup>, Michael Jarek<sup>7</sup>, Rolf Müller<sup>3,4</sup> and Joachim Wink<sup>\*2</sup>

<sup>1</sup> Department of Microbiology and Microbial Biotechnology, Faculty of Life Sciences and Biotechnology, Shahid Beheshti University GC, Tehran, Iran; Zahra.khosravi1365@yahoo.com; G-ebrahimi@sbu.ac.ir

<sup>2</sup> Microbial Strain Collection, Helmholtz Centre for Infection Research (HZI), Inhoffenstraße 7, D-38124 Braunschweig, Germany; Joachim.Wink@helmholtz-hzi.de; Chandra.Risdian@helmholtz-hzi.de

<sup>3</sup> Helmholtz Institute for Pharmaceutical Research Saarland (HIPS), Helmholtz Centre for Infection Research (HZI), Saarland University, Campus E8 1, 66123 Saarbrücken, Germany; ronald.garcia@helmholtz-hips.de; rolf.mueller@helmholtz-hips.de

<sup>4</sup> German Centre for Infection Research (DZIF), Partner Site Hannover-Braunschweig, Braunschweig, Germany; ronald.garcia@helmholtz-hips.de; rolf.mueller@helmholtz-hips.de

<sup>5</sup> Research Unit for Clean Technology, National Research and Innovation Agency (BRIN), Bandung 40135, Indonesia

<sup>6</sup> Department of Applied Microbiology, Justus Liebig University Gießen, 35392 Gießen, Germany; peter.kaempfer@umwelt.uni-giessen.de

<sup>7</sup> Genome Analytics, Helmholtz Centre for Infection Research (HZI), Inhoffenstraße 7, D-38124 Braunschweig, Germany; michael.jarek@helmholtz-hzi.de

<sup>8</sup> Correspondence: Zahra Khosravi Babadi: Zahra.khosravi1365@yahoo.com; Joachim Wink: Joachim.Wink@helmholtz-hzi.de; Tel.: +49 531 61814223; Fax: +49 531 61819499

† Contributed equally

**Table S1:** Cellular fatty acid profile of strain ZKHCC1 1396<sup>T</sup> and all type strains of *Corallococcus* species

The strains include: 1) Strain ZKHCC1 1396<sup>T</sup>, 2) *Corallococcus exercitus* AB043A<sup>T</sup>, 3) *C. interemptor* AB047A<sup>T</sup>, 4) *C. aberystwythensis* AB050A<sup>T</sup>, 5) *C. praedator* CA031B<sup>T</sup>, 6) *C. sicarius* CA040B<sup>T</sup>, 7) *C. carmarthensis* CA043D<sup>T</sup>, 8) *C. llansteffanensis* CA051B<sup>T</sup>, 9) *C. terminator* CA054A<sup>T</sup>, 10) *C. coralloides* DSM 2259<sup>T</sup>, 11) *C. exiguus* DSM 14696<sup>T</sup>, and 12) *C. silvisoli* c25j21<sup>T</sup>. The data for numbers 2-9, 10-11 and 12 were taken from previous studies [1, 2, 3], respectively. Trace amount (tr), < 0.10 %; ND, not determined. Major fatty acid was marked in

| Strain:                                                 | 1            | 2            | 3            | 4            | 5            | 6           | 7            | 8            | 9            | 10           | 11           | 12           |
|---------------------------------------------------------|--------------|--------------|--------------|--------------|--------------|-------------|--------------|--------------|--------------|--------------|--------------|--------------|
| C <sub>10:0</sub> (decanoic)                            | tr           | 1.02         | 2.66         | 2.15         | 2.72         | 0.60        | 6.15         | 1.56         | 1.06         | ND           | ND           | ND           |
| C <sub>11:0</sub> (undecanoic)                          | ND           | 2.58         | 6.56         | 2.57         | 1.62         | 0.36        | 1.77         | 1.77         | 0.96         | ND           | ND           | ND           |
| C <sub>15:0</sub> (pentadecanoic)                       | tr           | 19.78        | 11.36        | 7.60         | 7.00         | 5.87        | 6.47         | 20.28        | 13.78        | 0.10         | tr           | 0.3          |
| <i>iso</i> -C <sub>15:0</sub> (13-methyl-tetradecanoic) | <b>15.78</b> | <b>45.07</b> | <b>37.03</b> | <b>46.96</b> | <b>58.01</b> | <b>67.4</b> | <b>41.18</b> | <b>43.61</b> | <b>53.50</b> | <b>33.90</b> | <b>36.45</b> | <b>51.08</b> |
| <i>iso</i> -C <sub>16:0</sub> (14-methyl pentadecanoic) | 5.57         | 4.15         | 5.29         | ND           | 2.06         | 1.60        | 3.49         | 1.16         | 2.36         | 2.99         | 1.76         | 1.1          |
| C <sub>16:1</sub> (palmitoleic)                         | 0.89         | 6.97         | 6.65         | 0.33         | 5.32         | 4.95        | 8.01         | 7.84         | 6.77         | ND           | ND           | ND           |
| C <sub>17:0</sub> (2-hexyl-cyclopropaneoctanoic)        | ND           | ND           | 6.77         | ND           | 4.79         | ND          | ND           | 2.07         | ND           | ND           | ND           | ND           |
| <i>iso</i> -C <sub>17:0</sub> (isomargaric)             | 9.41         | 6.20         | 10.31        | 7.45         | 4.29         | 5.53        | 8.50         | ND           | 2.26         | 9.35         | 10.69        | 14.4         |
| C <sub>18:1</sub> (oleic)                               | ND           | 0.34         | ND           | 0.36         | ND           | 0.18        | ND           | 5.49         | 0.43         | ND           | ND           | ND           |

bold.

**Table S2:** Media and ingredients used in this study.

| Media                           | Ingredients/manufacturer                                                                                                                                                      |
|---------------------------------|-------------------------------------------------------------------------------------------------------------------------------------------------------------------------------|
| Middelbrock Broth medium        | Becton, Dickinson and Company, France                                                                                                                                         |
| Müller-Hinton Bouillon (MHB)    | Carl Roth GmbH + Co.KG, Germany                                                                                                                                               |
| Myc-medium<br>(pH 7.0)          | 1% phytone peptone<br>1% glucose<br>50 mM HEPES (11.8 g l <sup>-1</sup> )<br>Distilled. Water                                                                                 |
| Myxovirescin-medium<br>(pH 7.0) | 1% soy peptone<br>0.005% CaCl <sub>2</sub><br>0.025% MgSO <sub>4</sub><br>1 mg l <sup>-1</sup> CoCl <sub>2</sub><br>100 mM HEPES (23.8 g l <sup>-1</sup> )<br>Distilled Water |

|                        |                                             |
|------------------------|---------------------------------------------|
| P-medium               | 0,2% peptone (Marcor M)                     |
|                        | 0,8% starch (Cerestar)                      |
|                        | 0,4% Probion                                |
|                        | 0,2% yeast extract (Marcor typ 9000)        |
|                        | 0,1% CaCl <sub>2</sub> x 2H <sub>2</sub> O  |
|                        | 0,1% MgSO <sub>4</sub> x 4H <sub>2</sub> O  |
|                        | 100 mM HEPES (23,8 g l <sup>-1</sup> )      |
|                        | 8 mg l <sup>-1</sup> Fe-EDTA pH 7,5         |
| S-medium               | 0.2% glucose                                |
|                        | 0.1% MgSO <sub>4</sub> x 7 H <sub>2</sub> O |
|                        | 0.4% Soy flour                              |
|                        | 0.2% yeast extract                          |
|                        | 0.1% CaCl <sub>2</sub> .2H <sub>2</sub> O   |
|                        | 50 mM HEPES (11.9 g l <sup>-1</sup> )       |
| POL-medium<br>(pH 7.2) | Fe-EDTA 8 mg l <sup>-1</sup>                |
|                        | 0.3% probion                                |
|                        | 0.3% starch                                 |
|                        | 50 mM HEPES ( 11.9 g l <sup>-1</sup> )      |
|                        | 0.7% Mgso <sub>4</sub> .7H <sub>2</sub> O   |
|                        | 0.5% CaCl <sub>2</sub> .2H <sub>2</sub> O   |
| CY-medium<br>(pH 7.2)  | Distilled Water                             |
|                        | 0.3% casiston                               |
|                        | 0.1% yeast extract                          |
|                        | 0.1% CaCl <sub>2</sub>                      |
|                        | 50 mM HEPES (11.8 g l <sup>-1</sup> )       |
|                        | Distilled Water                             |
| CY / H-medium          | 50% CY- / 50% H-medium                      |
| E-medium<br>(pH 7.4)   | 0.4% skimmed milk                           |
|                        | 0.4% soy flour                              |
|                        | 1.0% starch                                 |
|                        | 0.1% MgSO <sub>4</sub>                      |
|                        | 50 mM HEPES (11.9 g l <sup>-1</sup> )       |
|                        | 8 mg l <sup>-1</sup> Fe-EDTA                |
|                        | 0.5% glycerine                              |
|                        | Distilled water                             |
| H-medium<br>(pH 7.4)   | 0.2% soy flour                              |
|                        | 0.2% glucose                                |
|                        | 0.8% starch                                 |
|                        | 0.2% yeast extract                          |
|                        | 0.1% CaCl <sub>2</sub>                      |
|                        | 0.1% MgSO <sub>4</sub>                      |
|                        | 50 mM HEPES (11.8 g l <sup>-1</sup> )       |
|                        | 8 mg l <sup>-1</sup> Fe-EDTA                |
|                        | Distilled water                             |

Supplementary References

- Livingstone, P.G.; Ingleby, O.; Girdwood, S.; Cookson, A.R.; Morphew, R.M.; Whitworth, D.E. Predatory organisms with untapped biosynthetic potential: descriptions of novel *Corallococcus* species *C. aberystwythensis* sp. nov., *C. carmarthensis* sp. nov., *C. exercitus* sp. nov., *C. interemptor* sp. nov., *C. llansteffanensis* sp. nov., *C. praedator* sp. nov., *C. sicarius* sp. nov., and *C. terminator* sp. nov. *Appl. Environ. Microbiol.* **2020.** 86, 01931–19.
- Garcia, R.; Pistorius, D.; Stadler, M.; Müller, R. Fatty acid-related phylogeny of myxobacteria as an approach to discover polyunsaturated omega-3/6 fatty acids. *J Bacteriol.* **2011.** 193, 1930–1942.

3. Zhang, X. J.; Feng, G. D.; Liu, Y.; Zhou, Y.; Deng, X.; Yao, Q.; Zhu, H. *Corallococcus silvisoli* sp. nov., a novel myxobacterium isolated from subtropical forest soil. *Arch. Microbiol.* **2022.** 204, 1-7.
